# Supplementary material for: A Normalization Framework for Emotional Attention
Source: PLoS Biol. 2016 Nov 21;14(11):e1002578. doi: 10.1371/journal.pbio.1002578 (PMC5117559; doi:10.1371/journal.pbio.1002578)
Supplement: S6 Data — (XLSX) [file pbio.1002578.s006.xlsx]

## Sheet: Figure s3a
Horizontal	Negative	Neutral	Positive	Vertical	Negative	Neutral	Positive
-0.85	0.739006	0.518321	1.00569	-0.85	1.14394	0.721168	0.312067
-0.75	1.04768	2.31608	2.30954	-0.75	1.91521	2.21908	1.83473
-0.65	1.92102	1.72191	3.56088	-0.65	0.76139	0.278945	1.33524
-0.55	6.17662	2.31441	5.67595	-0.55	3.51468	4.00796	2.53585
-0.45	6.34097	8.09595	8.43703	-0.45	4.8216	3.55723	5.32544
-0.35	9.68396	10.2102	9.10544	-0.35	7.85278	6.81259	8.63713
-0.25	12.1252	9.18722	12.2473	-0.25	7.91461	7.58368	7.18451
-0.15	16.9802	15.161	13.1813	-0.15	9.21618	7.41479	5.65391
-0.05	12.1573	13.9048	10.9286	-0.05	12.817	14.4278	13.367
0.05	8.29423	9.25328	8.04959	0.05	12.7976	14.5767	13.9893
0.15	4.97201	7.75435	5.31796	0.15	9.23152	9.19498	10.4798
0.25	5.69016	5.27541	8.11177	0.25	6.59423	6.55124	7.61285
0.35	6.20892	7.04638	6.23524	0.35	7.24582	6.5967	4.76879
0.45	4.40528	2.42403	1.97853	0.45	6.00385	7.60406	6.28002
0.55	2.12228	1.01838	0.384443	0.55	4.43051	4.90749	5.50395
0.65	0.977653	2.69646	0.726496	0.65	3.18468	1.22949	2.15638
0.75	0.129759	0.750151	2.11302	0.75	0.153961	2.27497	2.86595
0.85	0.0278182	0.351735	0.631136	0.85	0.404733	0.0363117	0.159994

## Sheet: Figure s3b
Horizontal	Negative	Neutral	Positive	Vertical	Negative	Neutral	Positive
-0.85	0.0518133	0.0748396	0.831698	-0.85	1.33197	0.093549	1.29084
-0.75	2.07358	3.85778	1.85039	-0.75	0.671032	2.96618	0.568772
-0.65	1.20397	1.08078	2.88294	-0.65	2.23533	0.781419	2.45615
-0.55	3.77669	2.66002	0.995303	-0.55	2.83918	5.7255	3.6387
-0.45	4.55459	2.81855	1.73445	-0.45	4.76877	3.30067	5.11257
-0.35	2.67962	4.16	5.81335	-0.35	7.07818	6.84663	5.68022
-0.25	6.66098	6.38568	4.9952	-0.25	9.18512	8.76301	7.76179
-0.15	7.08701	7.20945	6.51271	-0.15	8.73061	8.66111	9.78521
-0.05	8.75069	8.70308	8.85645	-0.05	12.2199	13.1838	10.8707
0.05	9.97091	9.62242	11.607	0.05	12.9982	15.0666	14.3375
0.15	12.631	13.9822	12.2949	0.15	8.06249	8.39996	10.3634
0.25	12.4913	11.3141	11.0848	0.25	6.51618	7.92847	6.39191
0.35	10.5401	8.29529	6.9919	0.35	7.00951	5.27953	3.78945
0.45	7.54193	7.84879	9.69638	0.45	5.74664	6.02847	7.97354
0.55	6.09348	7.43088	5.44942	0.55	4.15134	3.64676	5.12348
0.65	3.03726	2.62934	3.72898	0.65	5.10368	0.984975	0.600861
0.75	0.607976	1.55609	2.8253	0.75	0.803781	1.89985	3.24554
0.85	0.243468	0.372848	1.84763	0.85	0.54642	0.447684	1.00486
